1 **Title:**

2 **Leaf form diversification in an heirloom tomato results from alterations in two**  
3 **different *HOMEBOX* genes**

4

5 **Short Title:** Genetic basis of leaf shape variation between tomato cultivars

6

7 Hokuto Nakayama<sup>a,†</sup>, Steven D. Rowland<sup>a</sup>, Zizhang Cheng<sup>a</sup>, Kristina Zumstein<sup>a</sup>, Julie  
8 Kang<sup>b</sup>, Yohei Kondo<sup>c</sup> and Neelima R. Sinha<sup>a,\*</sup>

9

10 <sup>a</sup>Department of Plant Biology, University of California Davis, One Shields Avenue,  
11 Davis, CA 95616, U.S.A.

12 <sup>b</sup>Biology Department, 144 McCollum Science Hall, University of Northern Iowa, Cedar  
13 Falls, IA 50614, U.S.A.

14 <sup>c</sup>Division of Quantitative Biology, Okazaki Institute for Integrative Bioscience, National  
15 Institute for Basic Biology, National Institutes of Natural Sciences, Myodaiji,  
16 Higashiyama 5-1, Okazaki, Aichi 444-8787, Japan

17

18 <sup>†</sup>Current address: Graduate School of Science, Department of Biological Sciences, The  
19 University of Tokyo, Science Build. #2, 7-3-1 Hongo Bunkyo-ku Tokyo, 113-0033,  
20 Japan

21 <sup>\*</sup>To whom correspondence should be addressed. Email: [nrsinha@ucdavis.edu](mailto:nrsinha@ucdavis.edu)

22

23 **Contact Information**

24 Hokuto Nakayama: [hokuto@bs.s.u-tokyo.ac.jp](mailto:hokuto@bs.s.u-tokyo.ac.jp)

25 Steven D. Rowland: [sdrowland@ucdavis.edu](mailto:sdrowland@ucdavis.edu)

26 Zizhang Cheng: [chengxiaoyi\\_01@sina.com](mailto:chengxiaoyi_01@sina.com)

27 Kristina Zumstein: [kmsarte@ucdavis.edu](mailto:kmsarte@ucdavis.edu)

28 Julie Kang: [julie.kang@uni.edu](mailto:julie.kang@uni.edu)

29 Yohei Kondo: [y-kondo@nibb.ac.jp](mailto:y-kondo@nibb.ac.jp)

30 Neelima R. Sinha: [nrsinha@ucdavis.edu](mailto:nrsinha@ucdavis.edu)

31

32 **Keywords:** *BEL-LIKE HOMEODOMAIN*, *BIPINNATA*, evolution, leaf, *SOLANIFOLIA*, *Solanum*

33 *lycopersicum*, Tomato, *WUSCHEL RELATED HOMEODOMAIN 1*

34

35 **Abstract**

36 Domesticated plants and animals display tremendous diversity in various phenotypic  
37 traits and often this diversity is seen within the same species. Tomato (*Solanum*  
38 *lycopersicum*; Solanaceae) cultivars show wide variation in leaf morphology, but the  
39 influence of breeding efforts in sculpting this diversity is not known. Here, we  
40 demonstrate that a single nucleotide deletion in the homeobox motif of *BIPINNATA*,  
41 which is a *BEL-LIKE HOMEODOMAIN* gene, led to a highly complex leaf phenotype  
42 in an heirloom tomato, Silvery Fir Tree (SiFT). Additionally, a comparative gene  
43 network analysis revealed that reduced expression of the ortholog of *WUSCHEL*  
44 *RELATED HOMEobox 1* is also important for the narrow leaflet phenotype seen in  
45 SiFT. Phylogenetic and comparative genome analysis using whole-genome sequencing  
46 data suggests that the *bip* mutation in SiFT is likely a *de novo* mutation, instead of  
47 standing genetic variation. These results provide new insights into natural variation in  
48 phenotypic traits introduced into crops during improvement processes after  
49 domestication.

50

51 **Main**

52 Domestication and subsequent improvement processes have made animals and plants  
53 more suitable for agriculture and achieved improvement in their usability, quality, and  
54 yield (1). In contrast to domestication, usually occurring once for many crops, selection  
55 for improvement happened multiple times and in numerous locations, leading to  
56 varieties adapted to local conditions and needs (2). Consequently, many crops show  
57 fascinating morphological diversity. Indeed, Darwin focused on this morphological  
58 diversity more than 150 years ago and postulated that knowledge of the mechanisms  
59 underlying diversity generated under human selection would provide general principles  
60 for understanding the process of evolution under natural selection (3). Domesticated  
61 tomato, *Solanum lycopersicum* L. (Solanaceae), is one of the most economically  
62 important vegetable crops in the world (4). The domesticated tomato exhibits  
63 tremendous morphological variation because of a long breeding history (5).  
64 Additionally, many heirloom tomatoes, varieties passed down through several  
65 generations within a family or specific regions, have an interesting breeding history  
66 predating 1940 when commercial hybrids first started becoming available. These

67 heirloom cultivars, when compared to commercial tomatoes, show morphological  
68 variation and flavor profiles that are often favored by gardeners (6). Many heirloom  
69 tomatoes contain genetic loci that affect most of the target flavor chemicals to improve  
70 the flavor of modern commercial tomato (7), making heirloom tomatoes an interesting  
71 resource for research on tomato improvement. Silvery Fir Tree (SiFT) is a traditional  
72 Russian heirloom tomato (6). SiFT has a highly complex leaf phenotype, with leaflets  
73 that are narrower than those seen in processing tomatoes such as M82 (Figure 1A to  
74 1D). Interestingly, SiFT is sometimes used as an ornamental and landscaping plant  
75 rather than a crop due to the unique leaf shape in this variety, although SiFT does  
76 produce edible fruit (6). However, the genetic basis underlying the unique leaf  
77 morphology and breeding history of this cultivar is still unknown.

78 Here, we used a cross between SiFT and M82 to generate a mapping population and  
79 identified a single nucleotide deletion in the homeobox motif of a *BEL-LIKE*  
80 *HOMEODOMAIN (BELL)* gene, leading to a premature stop codon, and the highly  
81 complex leaf phenotype in SiFT. Based on genome sequencing, the *bip* mutation in  
82 SiFT is a *de novo* mutation that was not introgressed from other cultivars or wild

83 species. Further, we use a combination of gene co-expression network analysis and  
84 CRISPR-Cas9 knockout mutants to show that reduced expression of the *WUSCHEL*  
85 *RELATED HOMEODOMAIN 1* (*WOX1*) ortholog is also important for the narrower leaflet  
86 phenotype and reduced leaf vascular density in SiFT. Additionally, we show that the  
87 classic tomato leaf mutation, *solanifolia*, is caused by mutations in the same *WOX1*  
88 gene. These results provide insights into natural variation in phenotypic traits  
89 introduced into heirloom tomatoes during improvement after domestication.

90

91 **Results**

92 **SiFT has increased leaf complexity and reduced vascular density compared to M82**

93 Leaf complexity (LC) in SiFT is higher than that in M82 (Fig. 1A to 1C). The  
94 observation of gross leaf morphology showed distinct morphological differences  
95 between M82 and SiFT starting from the 1st formed leaves (Fig. 1D). While leaf  
96 primordia from Plastochron1 (P1) to P3 stages are not strikingly different between the  
97 cultivars, from P4 stage onward, difference in the number of leaflet primordia are  
98 consistently observed between M82 and SiFT (Fig. 1E). Thus, SiFT leaf primordia at P4  
99 and older stages are more active in generating leaflets compared to M82 leaves at the  
100 same developmental stage, and have a prolonged morphogenetic window compared to  
101 that in M82. Previous studies have shown leaf vascular density (LVD) variation among  
102 cultivars and mutants (8). Although no difference was observed in leaf anatomy around  
103 the midvein (Supplementary Fig. 1), LVD was different between M82 and SiFT (Fig.  
104 1F). Therefore, SiFT differs from M82 in leaf complexity, developmental trajectory,  
105 and vascular density.

106

107 **SiFT has a mutation in a *BEL-LIKE HOMEODOMAIN* gene, *BIPINNATA***

108 To identify genes involved in the regulation of leaf complexity (LC), bulked segregant  
109 analysis (BSA) on an F2 population (198 individuals) derived from a cross between  
110 M82 and SiFT was utilized (Supplementary Fig. 2). Two phenotypically defined bulks  
111 showing difference in LC (High-LC bulk and Low-LC bulk; Supplementary Fig. 3)  
112 were used to detect a locus between 45000000 and 55000000 bp on chromosome 2 that  
113 controlled LC (Fig. 2A; top and Supplementary Fig. 4). Whole genome sequencing of  
114 SiFT was used to define sequence variants in the genome including the region defined  
115 by BSA. However, we detected more than 100 variants in this region in the SiFT  
116 genome (Fig. 2A; middle). To narrow down the number of candidates, we used Protein  
117 Variation Effect Analyzer (PROVEAN), which allows us to predict whether an amino  
118 acid substitution or indel has an impact on the biological function of a protein  
119 (Supplementary Fig. 2) (9). The PROVEAN analysis found only one deleterious variant  
120 in the region (Fig. 2A; bottom), located in the *BIPINNATA* (*BIP*: Solyc02g089940) gene  
121 (Fig. 2B), which is known to encode a BEL-LIKE HOMEODOMAIN (BLH) protein  
122 (10). *BIP* is located in the *BLH* clade in the *BELL/KNOX1* phylogeny (Supplementary



123 Fig. 5). The 1 bp deletion at position 1674 within the homeobox domain generates a  
124 premature stop codon, and as a result the BIP protein is truncated in SiFT (Fig. 2B and  
125 2C, and Supplementary Fig. 6). Additionally, we confirmed that the genome of a  
126 different SiFT accession, previously sequenced by Tieman and coworkers, also has the  
127 same *bip* mutation (7) (Supplementary Fig. 7).

128

### 129 **Highly complex leaf phenotype seen in SiFT is caused by the *bip* mutation**

130 To verify the effect of the *bip* mutation on leaf phenotypes we investigated the  
131 morphology and early development of leaves in *bip3*, a *bip* mutant in the M82  
132 background (12). LC in *bip3* was similar to that of SiFT (Fig. 3A and 3B). Additionally,  
133 we confirmed that *bip3* leaf primordia are active in generating multiple leaflets at the P4  
134 stage as seen in SiFT (Fig. 3C). Although the *BIP* gene has been studied in Arabidopsis  
135 and tomato, the expression pattern of the *bip* gene in leaf primordia is not known (10,  
136 11). We performed whole-mount *in situ* hybridization and detected *BIP* gene expression  
137 in the proximal part of leaf primordium, where leaflet primordia emerge (Fig. 3D). A  
138 previous study showed that the expression of *TOAMTO KNOTTED-1 (Tkn1)*, the

139 ortholog of Arabidopsis *KNOX1* gene *BREVIPEDICELLUS*, is increased in the *bip*  
140 mutant (10). Quantitative RT-PCR (qPCR) was used to detect elevated level of *Tkn1*  
141 expression in SiFT compared to M82 (Fig. 3E). It is known that *KNOX* overexpression  
142 increases leaf complexity (12). These data suggest that the highly complex leaf  
143 phenotype seen in SiFT is caused by high expression of *Tkn1* facilitated by the *bip*  
144 mutation.

145 Although LC in *bip3* is quite similar to SiFT, the two genotypes have distinctly  
146 different leaflet shapes. Deep learning-based nonlinear PCA with leaflet shapes in M82,  
147 *bip3*, and SiFT suggested that *bip3* leaf shape is different from that of M82 but not the  
148 same as SiFT (Fig. 3F). This trend was confirmed by different methods (Supplementary  
149 Fig. 8). Indeed, leaflets of SiFT are narrower than those of *bip3* (Fig. 3G). Additionally,  
150 LVD in *bip3* is similar to that of M82 and differs from that of SiFT (Fig. 3H and 3I).  
151 Thus, the mutation at the *BIP* locus is not sufficient to explain all the leaf phenotypes  
152 seen in SiFT.

153

154 **Gene co-expression network analysis suggests a role for *Sl WOX1* in regulating leaf**

155 **phenotypes**

156 To investigate the molecular basis for leaf phenotypes seen in SiFT, we performed  
157 RNA-seq and compared differentially expressed genes (DEGs) between M82 and SiFT  
158 (Supplementary Table 1). However, the large number of DEGs precluded identification  
159 of genes critical in generating differences in leaf shape between two genotypes. Gene  
160 co-expression network (GCN) analysis can reveal biologically relevant information to  
161 identify molecular mechanisms underlying biological processes (13). Therefore, we  
162 constructed GCNs with RNA-seq data of M82 and SiFT and compared these networks  
163 to identify key genes responsible for the leaf phenotypes seen in SiFT. The genes used  
164 for the network analysis included a set of literature-curated genes involved in leaf  
165 development (14). The GCN for M82 showed differences in network structure, edge  
166 number, node number, and average of degree between genes when compared to the  
167 GCN for SiFT (Fig. 4A and Supplementary Table 2), indicating that many genes  
168 involved in leaf development are differentially expressed between the two genotypes.  
169 Community structure in the networks was analyzed based on the fast greedy modularity

170 optimization algorithm and GO enrichment analysis by community was performed (14).

171 Two communities (community 1: C1 and community 2: C2) predominate in both

172 networks (Fig. 4A), and GO enrichment analysis by community showed that

173 community 1 is enriched for the same GO terms between M82 and SiFT networks, in

174 particular, GO terms with higher Fold enrichment ( $>50$ ; full result of the GO

175 enrichment analysis, Supplementary Table 3). On the other hand, community 2 is

176 different between the two networks (Fig. 4B and Supplementary Table 3). In

177 community 2 of the M82 GCN, GO terms such as “cytokinin biosynthetic processes”

178 (GO: 0009691), “cytokinin metabolic process” (GO:0009690), “regulation of cell cycle

179 arrest” (GO: 0071156), and “cellular hormone metabolic process” (GO:0034754;

180 Supplementary Table 3) were more than 100 fold enriched. However, there were no

181 enriched GO terms with high fold enrichment in community 2 of the SiFT GCN (Fig.

182 4B and Supplementary Table 3), suggesting that genes in community 2 might be crucial

183 for explaining differences in leaf phenotype between M82 and SiFT. To compare the

184 two networks and identify the differences between them, we performed comparative

185 network analysis using the R package "DiffCorr" (15). DiffCorr allows us to find

186 statistically significant differences between two networks. The DiffCorr analysis  
187 identified 160 DiffCorr genes, which are differentially correlated genes between two  
188 networks (Supplementary Table 4). Those genes should have distinct expression pattern  
189 between M82 and SiFT. The 160 DiffCorr genes have distinct expression profiles  
190 between M82 and SiFT (Fig. 4C). Additionally, many genes having more differential  
191 correlations between two networks show distinct expression patterns, suggesting that  
192 those DiffCorr genes are responsible for the difference between the two networks (Fig.  
193 4C). The DiffCorr analysis revealed a *WOX*-like gene (Solyc03g118770) as the most  
194 significantly different between the M82 and SiFT GCNs (Supplementary Table 4) and  
195 the gene was located in community 2 of the M82 GCN (Supplementary Table 5). Based  
196 on phylogenetic analyses and alignments, the *WOX*-like gene is the tomato ortholog of  
197 *Arabidopsis WOX1* (Sl *WOX1*; Supplementary Fig. 9 and Supplementary Fig. 10). To  
198 understand the role of Sl *WOX1* in leaf development, we focused on the Sl *WOX1* sub-  
199 network which consisted of genes showing a direct connection to the Sl *WOX1*. This  
200 sub-network showed that the Sl *WOX1* gene is connected to many genes involved in  
201 leaf development in M82 GCN (Fig. 4D). Sl *WOX1* expression in SiFT leaf primordia

202 was lower than in M82 samples (Fig. 4E). To check the expression pattern of Sl *WOX1*,  
203 we performed whole mount *in situ* hybridization. Sl *WOX1* was expressed at the  
204 margins of leaf primordia and leaflet primordia (Figures 4F and 4G). This expression  
205 pattern was unaltered in SiFT (Supplementary Fig. 11). *WOX1* is known to express in  
206 leaf primordia and is involved in leaf lamina expansion in various plant species (16, 17).  
207 Moreover, in the *Medicago truncatula wox1* mutant, leaf vein density was lower than in  
208 wildtype (17). Therefore, Sl *WOX1* is likely a candidate gene for controlling both leaf  
209 width and leaf vein density in tomato.

210

### 211 **Sl *WOX1* is involved in leaf lamina expansion and leaf vascular development**

212 Sl *WOX1* is located on the long arm of chromosome 3 (Soly03g118770;  
213 <https://solgenomics.net/feature/17777644/details>) and previous studies in several plant  
214 species indicate that the *wox1* mutants have narrower leaflets and low LVD (16, 17).  
215 Therefore, we mutated Sl *WOX1* in M82 plants using the CRISPR/Cas9 system and  
216 obtained a null mutation, referred to here as CR-*wox1-1* (Fig. 5A). CR-*wox1-1* plants  
217 showed narrower leaves (Fig. 5B and 5C) and lower LVD than M82 (Fig. 5D),

218 matching the phenotype described in *wox1* mutants in other species (16, 17). We  
219 noticed that these phenotypes are quite similar to those of a classical tomato mutant,  
220 *solanifolia* (*sf*). *sf* is known to have narrower leaflets and reduced vascular density (18)  
221 and our rough mapping of the *solanifolia* mutation had identified a genomic location  
222 close to that known for the *WOX1* locus (at the end of chromosome 3; Supplementary  
223 Fig. 12). We obtained the two known alleles of the mutation (*sf* and *sf<sup>awl</sup>*) and another  
224 allele (e1862) from the Tomato Genetics Resource Center (TGRC;  
225 <http://tgrc.ucdavis.edu>) and Genes that makes Tomato  
226 (<http://zamir.sgn.cornell.edu/mutants/>), respectively. *sf*, *sf<sup>awl</sup>*, and e1862 arose in the  
227 Pearson, ROMA, and M82 backgrounds, respectively. *sf* has a 1 bp substitution (G to  
228 A) at position 230 in Sl *WOX1* resulting in an amino acid swap from arginine to  
229 histidine in the conserved homeodomain (Fig. 5A and Supplementary Fig. 13). *sf<sup>awl</sup>*  
230 and e1862 have a 1 bp substitution (G to A) at a splice site between intron 3 and exon 4,  
231 which results in 10 bp shift to the next splice site (Supplementary Fig. 13 and  
232 Supplementary Fig. 14). As a result, these mutants have a 10 bp deletion from position  
233 595 to 604 resulting in a premature stop codon, which truncates the *WOX1* protein such

234 that it lacks the conserved *WOX* domain (Fig. 5A and Supplementary Fig. 13 and  
235 Supplementary Fig. 14). All these mutants showed narrower leaflets and low LVD  
236 compared to their background genotypes (Fig. 5B to 5D). Hence, phenotypes seen in  
237 these classical mutants were same as that of CR-*wox1-1*. Hereafter, we refer to the Sl  
238 *WOX1* gene as *SOLANIFOLIA* (*SF*). These results indicated that *SF* functions in leaflet  
239 outgrowth and vascular development in tomato leaves, performing a role similar to that  
240 of *WOX1* in Arabidopsis and Medicago (16, 17, 19). These results confirm the role of  
241 reduced expression of *SF* in conferring narrower leaflet and lower LVD phenotypes in  
242 SiFT. Promoter sequences of *SF* in SiFT show no SNPs compared to the reference  
243 tomato genome (Supplementary Fig. 15), coincident with the fact that the pattern of  
244 expression *SF* is unaltered in SiFT compared to M82 (Supplementary Fig. 11). A  
245 previous study suggested that *ARF3* suppresses *WOX1* expression in Arabidopsis (20).  
246 In SiFT, expression level of the *ARF3* ortholog (Soly02g077560) was higher than that  
247 seen in M82 (Supplementary Fig. 16A) and the *ARF3* ortholog is known to be  
248 expressed in leaf primordia (21). Additionally, the SiFT *ARF3* promoter has a SNP that  
249 generated a new ZF-HD motif, which is known to be involved in binding of HB33



250 transcription factor (22) (Supplementary Fig. 16B). This *HB33* ortholog in Toamto  
251 (Solyc04g080490) is expressed in leaf primordia (Supplementary Fig. 17). Therefore,  
252 this gain-of-function SNP might explain the alteration in *SF* repression in SiFT.

253

254 ***bip sf* double mutant shows highly complex, narrow leaves, and low LVD**

255 Since SiFT has a *bip* mutation and *SF* repression, we generated a *bip sf* double mutant  
256 to investigate leaf phenotypes. Leaves in double mutant between *bip3* and e1862 had  
257 more leaflets than those of e1862 and the leaflets were narrower than those of *bip3* (Fig.  
258 6A). Sometimes, secondary leaflets were observed on the 4th leaf (Fig. 6B) and the  
259 secondary leaflets became more obvious in higher order leaves in the double mutant  
260 (Fig. 6C). Additionally, LVD in the double mutant was lower than that in *bip3* (Fig.  
261 6D), suggesting that these phenotypes are additive. Moreover, these trends were  
262 confirmed by another double mutant with a different combination of mutants  
263 (Supplemental Fig. 18). However, leaf morphology in the double mutant was not  
264 exactly the same as that of SiFT. Leaflets in leaves of SiFT have many lobes (Fig 1B),  
265 leaves of the double mutant, however, do not have obvious lobes (Fig. 6A and

266 Supplemental Fig. 18). This may be due to the difference between reduced expression  
267 and complete loss of function of the *SF* in the two genotypes. Indeed, *sf* single mutants  
268 having truncated WOX1 protein such as CR-*wox1-1*, *sf<sup>awl</sup>*, and e1862 do not have any  
269 lobes on leaves, whereas a weaker phenotype mutant, *sf*, shows lobed leaves (Fig. 5B).  
270 These results suggest that a mutation at *bip* and *WOX1* repression lead to highly  
271 complex and narrower leaves with reduced leaf vein density in SiFT, respectively (Fig.  
272 6E).

273

#### 274 **Phylogenetic placement of SiFT and the *bip* mutation**

275 Several mutations at the *BIP* locus have been described (10). However, the *BIP*  
276 mutation in the SiFT genome is different from these. Although previous studies  
277 constructed phylogenies with heirloom tomatoes (23), they were generated with whole-  
278 genome sequencing data. In order to understand the history of the *bip* mutation on  
279 chromosome 2, we first constructed a phylogenetic tree based on whole-genome  
280 sequencing data from 106 heirloom tomatoes  
281 (<http://www.tomatogenome.net/accessions.html>) to know the rough relationship

282 among them (Supplemental Fig. 19). Subsequently, we constructed a phylogenetic  
283 network using the "PhyloNetworks" package in Julia (24) to estimate whether  
284 introgressions from other tomatoes occurred in SiFT or not. This package allows us to  
285 discern various biological processes such as hybridization, introgression, or horizontal  
286 gene transfer. We used sequences around the *BIP* locus on chromosome 2 from 32  
287 representative tomatoes based on the phylogeny with 106 heirloom tomatoes. *S.*  
288 *pimpinellifolium*, which is thought to be the progenitor wild species for domesticated  
289 tomato, was used as an outgroup in the heirloom tomato phylogeny. *S. cheesemaniae*  
290 and *S. lycopersicum* var. *cerasiforme* were also used (Fig. 7A). The network indicated  
291 that a US heirloom tomato, Giant Oxheart (GiO), is sister to SiFT, however GiO does  
292 not show the highly complex leaf phenotype characteristic of SiFT and lacks the  
293 mutation in *BIP* (Fig. 7B and 7C). The phylogeny suggests that Druzba is the result of a  
294 cross between an ancestor of Glacier and an ancestor of Giant Oxheart/SFT. However,  
295 the *bip* mutation seen in SiFT does not exist in Druzba either (Fig. 7B and 7C).  
296 Additionally, the wild species, *S. pimpinellifolium* (Fig. 7D), and the other tomato  
297 varieties do not harbor the SiFT specific mutation at *BIP* (Supplemental Fig. 19 and

298 Supplementary Table 6). These data suggest that the *bip* mutation in SiFT is likely a *de*

299 *novo* mutation, instead of standing genetic variation.

300

301 **Discussion**

302 We found that SiFT, an heirloom tomato, has a highly complex leaf phenotype and  
303 carries a mutation in the *BIP* gene, which encodes a *BEL-LIKE HOMEODOMAIN*  
304 protein (Solyc02g089940). Leaf complexity in the *bip3* mutant was remarkably similar  
305 to that of SiFT. *BIP* is expressed at the proximal end of developing leaf primordia,  
306 where leaflet primordia emerge. Previous studies demonstrated that *KNOX1* genes are  
307 overexpressed in leaves of *bip* mutants (10, 11) and the overexpression of *KNOX1* gene  
308 in leaves dramatically increases leaf complexity by prolonging specific stages of leaf  
309 development (25). Indeed, *Tkn1*, a tomato *KNOX1* gene, is highly expressed in SiFT  
310 leaf primordia and SiFT and *bip3* leaf primordia exhibit prolonged morphogenesis. In  
311 *Arabidopsis*, *saw1 saw2* double mutant showing ectopic *KNOX1* expression has  
312 increased leaf serrations (10, 11), indicating that *BLH* genes including *BIP*, *SAW1*, and  
313 *SAW2* act to limit leaf margin growth and the function appears to be conserved between  
314 them. Therefore, the *bip* mutation found in SiFT is the likely cause of increasing in  
315 *Tkn1* expression, prolonging morphogenesis, and increasing complexity in SiFT leaf  
316 primordia. We also found that leaflet shape in SiFT is narrower than *bip3*, which is

317 confirmed by deep learning-based nonlinear PCA and leaf shape analysis. Additionally,  
318 leaf vein density in SiFT was lower than in *bip3*. To identify the genetic alterations  
319 beyond *BIP* that explain the rest of leaf phenotypes seen in SiFT, we used comparative  
320 gene co-expression network analysis. The *WOX1* ortholog (Soly03g118770) had the  
321 most altered correlations between the M82 and SiFT co-expression networks. The  
322 expression level of the *WOX1* ortholog in SiFT is lower than M82. Additionally, *wox1*  
323 mutants in Arabidopsis and Medicago are known to have narrower leaves compared to  
324 WT (16, 17). A CRISPR/Cas9 *wox1* mutant in Tomato showed narrower leaves and  
325 lower vascular density compared to WT. Moreover, we found that a classical tomato  
326 mutant, *solanifolia* (*sf*), harbored a deleterious mutation in the *WOX1* ortholog and  
327 those *sf* mutants showed narrower leaves and lower vascular density. Whole-mount in  
328 situ hybridization demonstrated that, similar to Arabidopsis and Medicago (16, 17), *SF*  
329 is also expressed at the margin of tomato leaf and leaflet primordia, consistent with the  
330 phenotype of leaf margins in *sf* mutants. In Arabidopsis, *WOX* genes promote lamina  
331 outgrowth through regulation of cell proliferation in cells expressing *WOX1* and their  
332 surrounding cells (16). Since leaf vascular development is influenced by this marginal

333 blade outgrowth (26), we propose that *SF* functions in leaf lamina outgrowth and  
334 couples this growth feature with vascular patterning. The causal mutation that leads to  
335 *SF* repression in SiFT might be a SNP in ARF3 promoter region in the SiFT genome,  
336 however this needs further analysis. *WOX1* is present in the early-diverging angiosperm,  
337 *Amborella trichopoda* (27), but the ancestral function in angiosperms is still unknown.  
338 Additionally, no *WOX1* homologs have been identified in monocots (17, 28). These  
339 facts suggest that the function of this *WOX1* gene in leaf development appears to be  
340 conserved at least across the eudicots (e.g. Arabidopsis, Medicago, and Tomato).  
341 Leaves of *bip* and *sf* double mutants are more complex than those of *wox1* and narrower  
342 than those of *bip3*. Moreover, the double mutant showed low LVD. A recent study  
343 suggested that the regulation of local growth and differentiation in leaf primordia leads  
344 to diversity in leaf shape (29). *BIP* and *SF* are thought to regulate local growth and  
345 differentiation in leaf primordia: *BIP* functions in the proximal part of leaf primordia  
346 and *SF* functions at the marginal part. Therefore we conclude that the highly complex  
347 and narrower leaf with reduced leaf vein density seen in SiFT is caused by a

348 combination of a mutation at *bip* and another as yet unknown second site mutation that  
349 leads to *SF* repression (Fig. 8).

350 A phylogenetic tree constructed with WGS data and a phylogenetic network constructed  
351 with sequences around *BIP* locus revealed that German Red Strawberry and Giant  
352 Oxheart are sister to SiFT, respectively. However, they lack the *BIP* mutation and have  
353 regular leaf shape. Moreover, none of the other varieties or wild species harbor the same  
354 mutation at *BIP* seen in SiFT. Although a wild tomato species *S. galapagense* has  
355 increased leaf complexity, the increased leaf phenotype is linked to promoter alterations  
356 in an atypical *KNOX1* gene *PETROSELENUM*, not in *BIP* (10). Therefore, these data  
357 indicate that the *BIP* mutation seen in SiFT is a *de novo* mutation that occurred during  
358 breeding and is not likely to be an introgression from other varieties or wild species.

359 These are consistent with the fact that there is no cultivated tomato showing SiFT-like  
360 leaf shape. This uniqueness of leaf shape in SiFT is achieved by the combination of a  
361 mutation at *bip* and *SF* repression, leading to use of this variety as an ornamental and  
362 landscaping plant (6). Emerging data suggest that leaflet shape affects fruit sugar  
363 content in tomato (30, 31). Therefore, identification of these novel mutations not only



364 provides new insights into the breeding history of heirloom tomatoes, but also suggests

365 potential targets for enhancing sugar content to improve fruit quality in tomato.

366

367

## 368 **Methods**

### 369 **Plant Materials**

370 The following lines and mutants were provided by the Tomato Genetics Resource

371 Center, University of California, Davis (USA; <https://tgrc.ucdavis.edu/>): *S.*

372 *lycopersicum* cv M82 (LA3475), *sf*<sup>^wl</sup> (LA2012), *sf* (LA2311), and Pearson (LA0012).

373 SiFT and ROMA were from our own stocks. *bip3* (e1444m2) was obtained from the

374 saturated mutation library of tomato (32). e1862 was obtained from the Genes that

375 makes Tomato (Israel; <http://zamir.sgn.cornell.edu/mutants/>).

376

### 377 **Growth conditions**

378 Tomato seeds were soaked in 50% bleach for 10 min, rinsed 3 times with water, and

379 placed on water dampened paper towel in Phytatrays (Sigma Aldrich). Seeds were

380 incubated in the dark at room temperature for 3 days then transferred to a growth

381 chamber set at 22°C under long-day conditions (16 h light; 8 h dark) for 4 days. After

382 approximately 7 days, seedlings had expanded cotyledons. These were then transplanted

383 to 24-cell seedling propagation trays and grown in the chamber for a 35 days as

384 described previously (33) and arranged in a randomized block design. The shoots or leaf  
385 primordia were frozen in liquid nitrogen just after sampling, and then stored at  $-80^{\circ}\text{C}$   
386 until use for DNA and RNA extractions. All F2 plants were grown in a field in the  
387 University of California, Davis with an interplant spacing of  $30 \times 30 \text{ cm}^2$  for  
388 transplanting.

389

### 390 **Morphological Observations**

391 For morphological observations and collecting tissues for RNA extractions, shoots and  
392 leaves were dissected under the dissection microscopes (Discovery.V12; ZEISS). To  
393 determine the vascular density of leaves, the 6th leaves were used and cleared using an  
394 ethanol and 50 % bleach following Rowland *et al.* (2019). The samples were then  
395 photographed under the microscopes (ECLIPSE E600; Nikon), and vascular length per  
396 unit area was determined using ImageJ software (<http://rsb.info.nih.gov/ij/>) ( $n = 4$ ). Leaf  
397 complexity was determined by counting the numbers of leaflets and intercalary leaflets  
398 on a fully developed leaf ( $n = 29$ ). Traditional leaf shape analysis was performed  
399 following (34). Leaf complexity and leaflet shapes were analyzed for leaves collected

400 from the chamber. The leaf complexity measures included all leaflets present on the  
401 leaf. After complexity was obtained the primary leaflets were removed and used for  
402 imaging and analysis of shape and size. The intercalary and secondary/tertiary leaflets  
403 were not used for shape analysis due to their smaller size and irregular shapes. The  
404 binary images were then processed in R using MOMOCS, a shape analysis package  
405 (35).

406

#### 407 **Phylogenetic Analyses of Isolated Genes**

408 The predicted amino acid sequences of isolated genes were aligned using ClustalW and  
409 readjusted manually. Phylogenetic trees were reconstructed using MEGA6 (36) using  
410 the neighbor-joining method (37) (38). Bootstrap values were derived from 1000  
411 replicate runs. The ML phylogenetic tree with the highest log likelihood is shown.  
412 Initial trees for the heuristic search were obtained automatically: Neighbor-Join and  
413 BioNJ algorithms were applied to a matrix of pairwise distances estimated with MCL,  
414 and then the topology with a superior log likelihood value was selected. The tree is  
415 drawn to scale, with branch lengths measured in the number of substitutions per site.

416

### 417 **Whole-mount In Situ Hybridization**

418 Portions of genes isolated in pCR 2.1 (Invitrogen) were amplified by PCR using the  
419 universal primers M13\_F (-20) (GTAAAACGACGGCCAC) and M13\_R  
420 (CAGGAAACAGCTATGAG). The amplified fragments were then used to produce  
421 digoxigenin (DIG)-labeled sense and antisense RNA probes using a DIG RNA Labeling  
422 Kit (Roche). Whole-mount in situ hybridization was performed following (39). Shoots  
423 were fixed in 1x PBST containing 4% (w/v) paraformaldehyde, 1% (w/v) glutaraldehyde.  
424 Fixed samples were dehydrated in an ethanol series. The dehydrated samples were stored  
425 in 100% methanol at  $-20^{\circ}\text{C}$  until use for the experiment. DIG-labeled sense and antisense  
426 RNA probes were synthesized with T7 RNA polymerase (Roche). For immunological  
427 detection, the samples were incubated in detection buffer containing NBT-BCIP (Roche)  
428 at  $25^{\circ}\text{C}$  for several hours or  $4^{\circ}\text{C}$  overnight. Photographs were taken using an ECLIPSE  
429 E600 (Nikon). The experiments were performed at least three times.

430

### 431 **Quantitative Real-Time PCR**

432 Total RNA was extracted from leaf primordia of plants grown for a month and used to  
433 synthesize cDNA, as described above. The quantitative RT-PCR analysis was conducted  
434 using the following gene-specific primer pairs: Tkn1\_RT\_F and Tkn1\_RT\_R;  
435 SIWOX1\_RT\_F and SIWOX1\_RT\_R; and SlGAPDH\_RT\_F and SlGAPDH\_RT\_R  
436 (Supplemental Table 7). Real-time PCR amplification was performed using the iTaq  
437 Universal SYBR (BIO-RAD) in a iQ5 Real-Time PCR Detection System (BIO-RAD).  
438 Experiments were performed in triplicate from three independent tissue RNA extractions.  
439 Expression was normalized to the Sl *GAPDH* control.

440

#### 441 **Deep learning-based nonlinear PCA**

442 For nonlinear PCA on image data, we used leaflet images from M82, *bip3*, and SiFT for  
443 the analysis (4th leaf;  $N < 55$ ) and adopted a pre-trained neural network with the  
444 ImageNet dataset, VGG19 (40), as feature extractor. Instead of the original scanned  
445 images, binary silhouette images were fed into the network in order to avoid the effects  
446 of non-morphogenetic features such as leaf color. We extracted images features from an  
447 intermediate layer, "block4\_pool" through Keras 2.3.1 library (<https://keras.io>). Then the

448 linear PCA was applied on the image features. We performed no training of the neural  
449 network with our data, so that the feature extraction was completely agnostic on which  
450 genotypes the leaves came from.

451

### 452 **DNA-Seq and RNA-Seq Library Preparation and Sequencing**

453 DNA-Seq libraries for BSA were prepared following (41). DNA was extracted using  
454 GeneJET Plant Genomic DNA Purification Mini Kit (Thermo Scientific, Waltham, MA,  
455 USA) from plants grown for a month. DNA-Seq libraries for phylogenetic analysis were  
456 prepared based on BrAD-seq (42) with the following modifications: After DNA  
457 fragmentation with Covaris E220 (Covaris, Inc. Woburn, MA, USA), the fragmented  
458 DNA was end-repaired, A-tailed, and adapter ligated with Y-adapter. Enrichment PCR  
459 was then performed with the adapter ligated product as described Townsley et al., 2015.  
460 After final library cleanup with AMPure beads (Beckman Coulter, Brea, CA, USA),  
461 RNA-Seq libraries were prepared following (42) from four biological replicates of  
462 proximal and distal regions of leaf primordia at four developmental stages (meristem +  
463 P1-P3; P4; P5). DNA-Seq libraries were sequenced at Novogene (Novogene Inc.

464 Sacramento, CA, USA). RNA-Seq libraries were sequenced at the University of  
465 California Berkeley Vincent J. Coates Genomics Sequencing Laboratory using the HiSeq  
466 2000 platform (Illumina Inc. San Diego, CA, USA).

467

468 **SNP calling and Allele frequency analysis with DNA-seq data and Phylogenetic**  
469 **analysis with Whole genome sequencing data**

470 To detect SNPs in SiFT genome and perform phylogenetic analysis, all variants detected  
471 by CLC Genomics Workbench 11.0 (CLC Bio, a QIAGEN Company, Aarhus, Denmark).

472 After read mapping and local realignment, Fixed Ploidy Variant Detection function was  
473 used for calculation of allele frequency. For phylogenetic analysis, the data were exported  
474 as vcf files. The SNPRelate package for R (43) was used to determine the variant positions  
475 that overlapped between cultivars and then all sequences combined into a single gds file.

476 This file was run through SNPhylo (44) with the following parameters: The linkage  
477 disequilibrium was set to 1.0, as we wanted to exclude as few variants as possible based  
478 on this factor, minor allele frequency was set to 0.05, and the Missing rate was set to 0.1.

479 One thousand bootstraps were performed for confidence intervals and significance. *S.*



480 *pimpinellifolium* was used as the out group. The output bootstrapped tree was displayed

481 in MEGA6 (36).

482

### 483 **Mapping, Normalization, and Network analysis with RNA-Seq data**

484 The 50 bp single-end sequence reads obtained were quality trimmed and parsed to

485 individual libraries using custom Perl scripts. All reads were mapped to the ITAG2.4

486 genome build (downloadable from [http://solgenomics.net/itag/release/2.4/list\\_files](http://solgenomics.net/itag/release/2.4/list_files))

487 using RSEM/eXpress with the default parameters (45). The uniquely mapped read data

488 was normalized using the Bioconductor package EdgeR ver. 2.11 with the trimmed

489 mean of M-values method. Bioinformatics and statistical analyses were performed on

490 the iPLANT (Cyverse) Atmosphere cloud server (46). Gene Co-expression network

491 analysis was performed following (14) by using the R script. The R script for RNA-Seq

492 gene coexpression network analysis deposited on GitHub (Link:

493 <https://github.com/Hokuto-GH/gene-coexpression-network-script>). For GO enrichment

494 analysis, we used GENEONTOLOGY enrichment analysis tools

495 (<http://geneontology.org/docs/go-enrichment-analysis/>). DiffCorr analysis was

496 performed following (15). The normalized count data from M82 and SiFT was used for  
497 the analysis. DiffCorr genes were then analyzed to identify the most different gene  
498 between two genotypes at a 0.005 FDR cut-off. To analyze and visualize the DiffCorr  
499 genes, Cytoscape was used (<https://cytoscape.org/>). The number of Edges of each  
500 DiffCorr gene was calculated by analyze network function in the Cytoscape. Then, the  
501 numbers were compared to figure out the most different gene between two genotypes.

502

### 503 **CRISPR–Cas9 mutagenesis and plant transformation**

504 CRISPR–Cas9 mutagenesis and generation of transgenic plants was performed  
505 following REF. Guide (g) RNAs for *SF/SIWOX1* (Solyc03g118770) were designed  
506 using the CCTop (<https://crispr.cos.uni-heidelberg.de/help.html>) and two gRNAs were  
507 designed (Fig. 5). Vectors were assembled using the Golden Gate cloning system as  
508 described (47). Final binary vector was transformed into the tomato cultivars M82 by  
509 *Agrobacterium tumefaciens*-mediated transformation. The transformation was  
510 performed at the Ralph M. Parsons Foundation Plant Transformation Facility  
511 (University of California, Davis). The first-generation ( $T_0$ ) transgenics were genotyped

512 using GT-seq following (48). It revealed a single nucleotide substitution (C to A) in  
513 gRNA2 (g2) region. Unfortunately, there were no T<sub>0</sub> transgenics having mutation in the  
514 region of gRNA1 (g1) region. After the genotyping and self-pollination in the green  
515 house, we obtained T<sub>1</sub> plants having mutated *sf/slwox1* gene. First, we screened those  
516 plants by leaf phenotypes because *wox1* mutants must have narrower leaflets compared  
517 to WT based on previous studies with various kinds of plant species. Then we did  
518 genotyping by sequencing to confirm whether each individual has the *sf/slwox1*  
519 mutation or not.

520

### 521 **PhyloNetwork Analyses**

522 To perform phylogenetic analysis, all SNPs detected by CLC Genomics Workbench  
523 11.0 (CLC Bio, a QIAGEN Company, Aarhus, Denmark) from whole genome  
524 sequencing obtained from the 360 genomes project (49) were exported as a vcf file. The  
525 VCFtools package (50) was to convert vcf files to fasta files and these sequences were  
526 aligned using ClustalW. All aligned SNPs from the two megabase region surrounding  
527 the BIP gene for 32 cultivars were run through the TICR pipeline (51). They were then

528 analyzed using PhyloNetworks with default settings with the following exceptions: the  
529 number of runs was set to 10 and Nfail was set to 10. After the hybrid network was  
530 obtained bootstrap analysis was done in PhyloNetworks using default settings with the  
531 following exceptions: Runs was set to 10 and Nfail was set to 10. These adjustments  
532 were made to decrease processing time. The bootstrapped tree was output in  
533 Dendroscope (52).

534

### 535 **Statistical analysis**

536 All statistical analyses were performed using JMP (JMP Pro 14.0.0, 2018) software. To  
537 determine statistical significance, measurements were modeled using general linear  
538 regression model and tested by a one-way ANOVA followed by Tukey's honestly  
539 significant difference, if necessary.

540

### 541 **Data availability**

542 All data is available in the main text or the supplementary materials. All DNA-Seq and  
543 RNA-Seq raw data are deposited on DDBJ DRA009167- 009182 (BioProject:

544 PRJDB8552). Source Data files for all main and supplementary figures are available in  
545 the online version of the paper. All additional data sets are available from the  
546 corresponding author on request.

547

#### 548 **Acknowledgements**

549 This work was supported by grants from the USDA NIFA (2014-67013-21700), NSF;  
550 IOS (1558900), and JSPS KAKENHI (19K23742 and 20K06682 to H.N. and  
551 19H05670 to Y.K.). Hokuto Nakayama was a recipient of a JSPS Fellowship  
552 (13J00161). We are grateful to Lauren Hughes for generating the initial cross between  
553 SiFT and M82, Donnelly West for the F2 seeds, and Amber Flores for helping with field  
554 measurements.

555

#### 556 **Author contributions**

557 H.N. initiated the project. N.R.S. supervised the project. H.N. and N.R.S. designed  
558 experiments. H.N. performed the majority of the experiments and analyses and prepared

559 figures. S.D.R., Z.C., K.Z., J.C., and Y.K. performed experiments. H.N. and S.D.R.

560 analyzed the data. H.N. and N.R.S. wrote the paper with the input from all authors.

561

562 **Corresponding Author**

563 Correspondence to Neelima R. Sinha

564

565 **Competing interests**

566 The authors declare that they have no competing interests.

567

568 **Figure legends**

569

570 **Figure 1. Gross morphology and development in M82 and SiFT leaves.**

571 Top view of shoots (A), and mature leaf morphology (B). The 4th leaves were used for  
572 (B). Left: M82; right: SiFT. (C) Comparison of leaf complexity ( $N = 14$ ).  $p = 0.0000059$   
573 (Welch's t-test). (D) Comparison of leaf morphology of M82 (upper) and SiFT (lower).  
574 All silhouettes are based on photographic images. The youngest leaf is at the right and  
575 the oldest (cotyledons) is at the left. (E) Developmental trajectory of M82 and SiFT leaf  
576 primordia. The 4th and 5th leaves were represented. (F) Cleared terminal leaflet images  
577 of M82 and SiFT. Bars = 2 cm in (A), (B) and (D), 100  $\mu\text{m}$  in (E), and 1 mm in (F).

578

579

580 **Figure 2. Identification of the causative mutation for the *BIPINNATA* gene.**

581 (A) Top: allele frequency between different pools of segregating populations (red: high  
582 complexity pool; blue: low complexity pool) is shown for chromosome 2 (Chr 2).  
583 Middle: variants (SNPs and indels) in SiFT from whole genome sequencing data. Each  
584 dot indicates variant position on Chr 2. Bottom: deleterious mutations in SiFT indicated  
585 from PROVEAN. Each vertical line indicates deleterious mutation on Chr 2. All panels  
586 (top, middle, and bottom) show the same scale on Chr 2. (B) Exon and intron structure  
587 of *BIPINNATA* (*BIP*). *BIP* gene contains five exons. SiFT contains an 1 bp deletion,  
588 which leads truncated protein and an amino acid change in the highly conserved amino  
589 acid of homeodomain (C).

590

591

592 **Figure 3. *bipinnata* leaf phenotypes.**

593 (A) Mature leaf morphology. The 4th leaves were used. Left: SiFT; right: *bip3*. (B)  
594 Comparison of leaf complexity ( $N = 14$ ). (C) Leaf development of *bip3* at P4 stage. (D)  
595 Whole mount *in situ* localization of *BIP* transcripts in M82. Left: sense probe; Right:  
596 antisense probe. (E) Expression level of *Tkn1* in leaf primordia ( $N = 3$ ).  $p = 0.00107513$   
597 (Welch's t-test). (F) Deep learning-based nonlinear PCA with leaflet shapes ( $N < 55$ ).  
598 Blue: M82, pink: SiFT, and orange: *bip3*. (G) Comparison of terminal leaflet  
599 morphology. Left; leaflet morphology used for leaf shape analysis. All silhouettes are

600 based on scanned images. Right; results of leaf width measurement with terminal  
601 leaflets.  $p = 8.8 \times 10^{-8}$  (Welch's *t*-test). (H) Cleared terminal leaflet images of M82,  
602 SiFT and *bip3*. (I) Vascular density per unit area. The data was assessed using pair-wise  
603 comparisons with Tukey-Kramer HSD test. Bars = 2 cm in (A), 100  $\mu\text{m}$  in (C), 500  $\mu\text{m}$   
604 in (D), 1 cm in (G), and 1 mm in (H).

605

606

607 **Figure 4. Gene co-expression network analysis with M82 and SiFT RNA-seq data.**

608 (A) Gene co-expression networks for genes involved in leaf development. Each node  
609 represents genes. Only nodes with at least one edge are represented. Left: M82; right:  
610 SiFT. (B) An overview of the enriched GO terms visualized by bubble plot. The  
611 analysis was performed by the community in each network (C1 and C2). Each bubble  
612 represents a GO term and only GO terms with higher Fold enrichment ( $>50$ ) are  
613 represented. For full result of the GO enrichment analysis, please see Supplementary  
614 Table 3. (C) A profile of 160 DiffCorr genes. The plot on the top: the number of  
615 differential correlations of each DiffCorr gene. A higher number means more difference  
616 between M82 and SiFT networks. The heat map on the bottom: a comparison of  
617 expression level of each DiffCorr gene between M82 and SiFT. Each expression level is  
618 shown as a blue-to-yellow-colored scale. The 160 DiffCorr genes were sorted by the  
619 number of differential correlations (Left: low; right: high). The position of each gene is  
620 the same between the top and bottom panels. (D) The SI *WOX1* gene network from M82  
621 shown in (A). This network is consisted of genes only showing a direct connection to  
622 the SI *WOX1*. (E) Expression level of SI *WOX1* in leaf primordia ( $N = 4$ ).  $p = 0.011$   
623 (Welch's *t*-test). (F and G) Whole mount *in situ* localization of SI *WOX1* transcripts in  
624 M82. (F) Leaf primordia. (G) Leaflet primordia. Left: sense probe; right: antisense  
625 probe in each panel. Bars = 100  $\mu\text{m}$  in (F) and (G).

626

627

628 **Figure 5. *solanifolia/slwox1* leaf phenotypes.**

629 (A) Exon and intron structure of *SF/SIWOX1*. The tomato *SF/SIWOX1* gene contains  
630 four exons. (B) Mature leaf morphology of *sf/slwox1* mutants. The 4th leaves were used.  
631 (C) Comparison of aspect ratio (width/length) and width of terminal leaflet ( $N = 10$ ).  
632 Letters indicate significance groups; samples with the same letters are not significantly



633 different. All data were assessed using pair-wise comparisons with Tukey-Kramer HSD  
634 test. (D) Comparison of vascular density. Cleared terminal leaflet images. Bars = 2 cm  
635 in (B) and 1 mm in (D).

636

637

638 **Figure 6. *bip3 sf* double mutant leaf phenotypes.**

639 (A) Mature leaf morphology of *bip3 e1862* double mutant. From left to right: *bip3*,  
640 *e1862*, and *bip3 e1862* double mutant. The 4th leaves were used. (B) Close-up view of a  
641 secondary leaflet on a 4th leaf in the double mutant shown in (A). (C) Comparison of  
642 secondary leaflets on matured 6th leaf from 60 days old seedlings. (D) Cleared terminal  
643 leaflet images of *bip3*, *e1862*, and *bip3 e1862* double mutant. (E) A schematic model  
644 for leaf development in SiFT. Bars = 2 cm in (A) and (C), 1 cm in (B), and 1mm = in  
645 (D).

646

647

648 **Figure 7. Reconstruction of breeding history and comparison of SNPs data.**

649 (A) PhyloNetwork with sequences around the *BIP* locus on chromosome 2. The  
650 network describes various biological processes such as hybridization or introgression  
651 (Blue lines). The bootstrap values are indicated on branches (only those more than 50%  
652 are indicated on the tree). (B) Magnified view of the network shown in (A) focusing on  
653 SiFT. Comparison of SNPs data around *BIP* locus (Solyc02g089940) with heirloom  
654 tomatoes (C) and a wild species (D). Each vertical black line indicates a SNP.

655

656

657 **Figure 8. Breeding history and diversification of leaf shape in cultivated Toamto.**

658 Simplified phylogeny presented in Fig. 7 with leaf morphologies. Boxes indicate  
659 presumed key events during evolution. See text for details.

660

661

662

663 **References**

- 664 1. J. Diamond, Evolution, consequences and future of plant and animal domestication. *Nature*  
665 **418**, 700-707 (2002).
- 666 2. R. S. Meyer, M. D. Purugganan, Evolution of crop species: genetics of domestication and  
667 diversification. *Nat Rev Genet* **14**, 840-852 (2013).
- 668 3. C. Darwin, *The variation of animals and plants under domestication* (O. Judd, 1868), vol.  
669 2.
- 670 4. J. A. Labate *et al.*, "Tomato" in *Vegetables*, C. Kole, Ed. (Springer Berlin Heidelberg, Berlin,  
671 Heidelberg, 2007), 10.1007/978-3-540-34536-7\_1, pp. 1-125.
- 672 5. G. Bauchet, M. Causse, "Genetic diversity in tomato (*Solanum lycopersicum*) and its wild  
673 relatives" in *Genetic diversity in plants*. (InTech, 2012).
- 674 6. A. Goldman, V. Schragr (2008) *The Heirloom Tomato: From Garden to Table*.  
675 (Bloomsbury Publishing: New York).
- 676 7. D. Tieman *et al.*, A chemical genetic roadmap to improved tomato flavor. *Science* **355**, 391-  
677 394 (2017).
- 678 8. S. Kessler, M. Kim, T. Pham, N. Weber, N. Sinha, Mutations altering leaf morphology in  
679 tomato. *International journal of plant sciences* **162**, 475-492 (2001).
- 680 9. Y. Choi, G. E. Sims, S. Murphy, J. R. Miller, A. P. Chan, Predicting the functional effect of  
681 amino acid substitutions and indels. *PLoS One* **7**, e46688 (2012).
- 682 10. S. Kimura, D. Koenig, J. Kang, F. Y. Yoong, N. Sinha, Natural variation in leaf morphology  
683 results from mutation of a novel KNOX gene. *Curr Biol* **18**, 672-677 (2008).
- 684 11. R. Kumar *et al.*, The Arabidopsis BEL1-LIKE HOMEODOMAIN proteins SAW1 and SAW2  
685 act redundantly to regulate KNOX expression spatially in leaf margins. *Plant Cell* **19**, 2719-  
686 2735 (2007).
- 687 12. B. J. Janssen, L. Lund, N. Sinha, Overexpression of a homeobox gene, LeT6, reveals  
688 indeterminate features in the tomato compound leaf. *Plant Physiol* **117**, 771-786 (1998).
- 689 13. P. Tieri *et al.*, *Network Inference and Reconstruction in Bioinformatics*. (2019).
- 690 14. Y. Ichihashi *et al.*, Evolutionary developmental transcriptomics reveals a gene network  
691 module regulating interspecific diversity in plant leaf shape. *Proceedings of the National*  
692 *Academy of Sciences of the United States of America* **111**, E2616-2621 (2014).
- 693 15. A. Fukushima, DiffCorr: an R package to analyze and visualize differential correlations in  
694 biological networks. *Gene* **518**, 209-214 (2013).

- 695 16. M. Nakata *et al.*, Roles of the middle domain-specific WUSCHEL-RELATED HOMEBOX  
696 genes in early development of leaves in Arabidopsis. *Plant Cell* **24**, 519-535 (2012).
- 697 17. M. Tadege *et al.*, STENOFOLIA regulates blade outgrowth and leaf vascular patterning in  
698 *Medicago truncatula* and *Nicotiana sylvestris*. *Plant Cell* **23**, 2125-2142 (2011).
- 699 18. K. C. Sekhar, V. Sawhney, Leaf development in the normal and solanifolia mutant of tomato  
700 (*Lycopersicon esculentum*). *American journal of botany* **77**, 46-53 (1990).
- 701 19. H. Wang *et al.*, Overexpression of the WOX gene STENOFOLIA improves biomass yield  
702 and sugar release in transgenic grasses and display altered cytokinin homeostasis. *PLoS*  
703 *genetics* **13**, e1006649 (2017).
- 704 20. C. Guan *et al.*, Spatial Auxin Signaling Controls Leaf Flattening in Arabidopsis. *Curr Biol*  
705 **27**, 2940-2950.e2944 (2017).
- 706 21. T. Yifhar *et al.*, Failure of the tomato trans-acting short interfering RNA program to regulate  
707 AUXIN RESPONSE FACTOR3 and ARF4 underlies the wiry leaf syndrome. *Plant Cell* **24**,  
708 3575-3589 (2012).
- 709 22. S.-Y. Hong, O.-K. Kim, S.-G. Kim, M.-S. Yang, C.-M. Park, Nuclear import and DNA  
710 binding of the ZHD5 transcription factor is modulated by a competitive peptide inhibitor in  
711 Arabidopsis. *Journal of Biological Chemistry* **286**, 1659-1668 (2011).
- 712 23. S. Soyk *et al.*, Duplication of a domestication locus neutralized a cryptic variant that caused  
713 a breeding barrier in tomato. *Nature plants* **5**, 471-479 (2019).
- 714 24. C. Solís-Lemus, P. Bastide, C. Ané, PhyloNetworks: A Package for Phylogenetic Networks.  
715 *Molecular Biology and Evolution* **34**, 3292-3298 (2017).
- 716 25. E. Shani *et al.*, Stage-specific regulation of *Solanum lycopersicum* leaf maturation by class  
717 1 KNOTTED1-LIKE HOMEBOX proteins. *Plant Cell* **21**, 3078-3092 (2009).
- 718 26. M. G. Sawchuk, A. Edgar, E. Scarpella, Patterning of leaf vein networks by convergent  
719 auxin transport pathways. *PLoS genetics* **9**, e1003294 (2013).
- 720 27. D. E. Soltis *et al.*, The Amborella genome: an evolutionary reference for plant biology.  
721 *Genome biology* **9**, 402 (2008).
- 722 28. F. Zhang *et al.*, STENOFOLIA recruits TOPLESS to repress ASYMMETRIC LEAVES2 at  
723 the leaf margin and promote leaf blade outgrowth in *Medicago truncatula*. *Plant Cell* **26**,  
724 650-664 (2014).
- 725 29. D. Kierzkowski *et al.*, A Growth-Based Framework for Leaf Shape Development and  
726 Diversity. *Cell* **177**, 1405-1418.e1417 (2019).
- 727 30. S. D. Rowland *et al.*, Leaf shape is a predictor of fruit quality and cultivar performance in

- 728 tomato. *The New phytologist* 10.1111/nph.16403 (2019).
- 729 31. D. H. Chitwood *et al.*, Resolving distinct genetic regulators of tomato leaf shape within a  
730 heteroblastic and ontogenetic context. *Plant Cell* **26**, 3616-3629 (2014).
- 731 32. N. Menda, Y. Semel, D. Peled, Y. Eshed, D. Zamir, In silico screening of a saturated  
732 mutation library of tomato. *The Plant journal : for cell and molecular biology* **38**, 861-872  
733 (2004).
- 734 33. S. Kimura, N. Sinha, How to grow tomatoes. *CSH protocols* **2008**, pdb.prot5081 (2008).
- 735 34. D. H. Chitwood *et al.*, A modern ampelography: a genetic basis for leaf shape and venation  
736 patterning in grape. *Plant Physiol* **164**, 259-272 (2014).
- 737 35. V. Bonhomme, S. Picq, C. Gaucherel, J. Claude, Momocs: outline analysis using R. *J Stat*  
738 *Softw* **56**, 1-24 (2014).
- 739 36. K. Tamura, G. Stecher, D. Peterson, A. FilipSKI, S. Kumar, MEGA6: Molecular Evolutionary  
740 Genetics Analysis version 6.0. *Mol Biol Evol* **30**, 2725-2729 (2013).
- 741 37. N. Saitou, M. Nei, The neighbor-joining method: a new method for reconstructing  
742 phylogenetic trees. *Mol Biol Evol* **4**, 406-425 (1987).
- 743 38. K. Tamura, M. Nei, Estimation of the number of nucleotide substitutions in the control  
744 region of mitochondrial DNA in humans and chimpanzees. *Mol Biol Evol* **10**, 512-526 (1993).
- 745 39. F. Rozier, V. Mirabet, T. Vernoux, P. Das, Analysis of 3D gene expression patterns in plants  
746 using whole-mount RNA in situ hybridization. *Nature protocols* **9**, 2464-2475 (2014).
- 747 40. K. Simonyan, A. Zisserman, Very deep convolutional networks for large-scale image  
748 recognition. *arXiv preprint arXiv:1409.1556* (2014).
- 749 41. B. A. Rowan, D. K. Seymour, E. Chae, D. S. Lundberg, D. Weigel, Methods for Genotyping-  
750 by-Sequencing. *Methods in molecular biology (Clifton, N.J.)* **1492**, 221-242 (2017).
- 751 42. B. T. Townsley, M. F. Covington, Y. Ichihashi, K. Zumstein, N. R. Sinha, BrAD-seq: Breath  
752 Adapter Directional sequencing: a streamlined, ultra-simple and fast library preparation  
753 protocol for strand specific mRNA library construction. *Frontiers in plant science* **6**, 366  
754 (2015).
- 755 43. X. Zheng *et al.*, A high-performance computing toolset for relatedness and principal  
756 component analysis of SNP data. *Bioinformatics (Oxford, England)* **28**, 3326-3328 (2012).
- 757 44. T. H. Lee, H. Guo, X. Wang, C. Kim, A. H. Paterson, SNPhylo: a pipeline to construct a  
758 phylogenetic tree from huge SNP data. *BMC Genomics* **15**, 162 (2014).
- 759 45. B. Li, C. N. Dewey, RSEM: accurate transcript quantification from RNA-Seq data with or  
760 without a reference genome. *BMC bioinformatics* **12**, 323 (2011).

- 761 46. S. A. Goff *et al.*, The iPlant Collaborative: Cyberinfrastructure for Plant Biology. *Frontiers*  
762 *in plant science* **2**, 34 (2011).
- 763 47. S. Werner, C. Engler, E. Weber, R. Gruetzner, S. Marillonnet, Fast track assembly of  
764 multigene constructs using Golden Gate cloning and the MoClo system. *Bioengineered bugs*  
765 **3**, 38-43 (2012).
- 766 48. N. R. Campbell, S. A. Harmon, S. R. Narum, Genotyping-in-Thousands by sequencing (GT-  
767 seq): A cost effective SNP genotyping method based on custom amplicon sequencing.  
768 *Molecular ecology resources* **15**, 855-867 (2015).
- 769 49. T. Lin *et al.*, Genomic analyses provide insights into the history of tomato breeding. *Nature*  
770 *genetics* **46**, 1220-1226 (2014).
- 771 50. P. Danecek *et al.*, The variant call format and VCFtools. *Bioinformatics (Oxford, England)*  
772 **27**, 2156-2158 (2011).
- 773 51. N. W. Stenz, B. Larget, D. A. Baum, C. Ané, Exploring Tree-Like and Non-Tree-Like  
774 Patterns Using Genome Sequences: An Example Using the Inbreeding Plant Species  
775 *Arabidopsis thaliana* (L.) Heynh. *Syst Biol* **64**, 809-823 (2015).
- 776 52. D. H. Huson, C. Scornavacca, Dendroscope 3: an interactive tool for rooted phylogenetic  
777 trees and networks. *Syst Biol* **61**, 1061-1067 (2012).

778

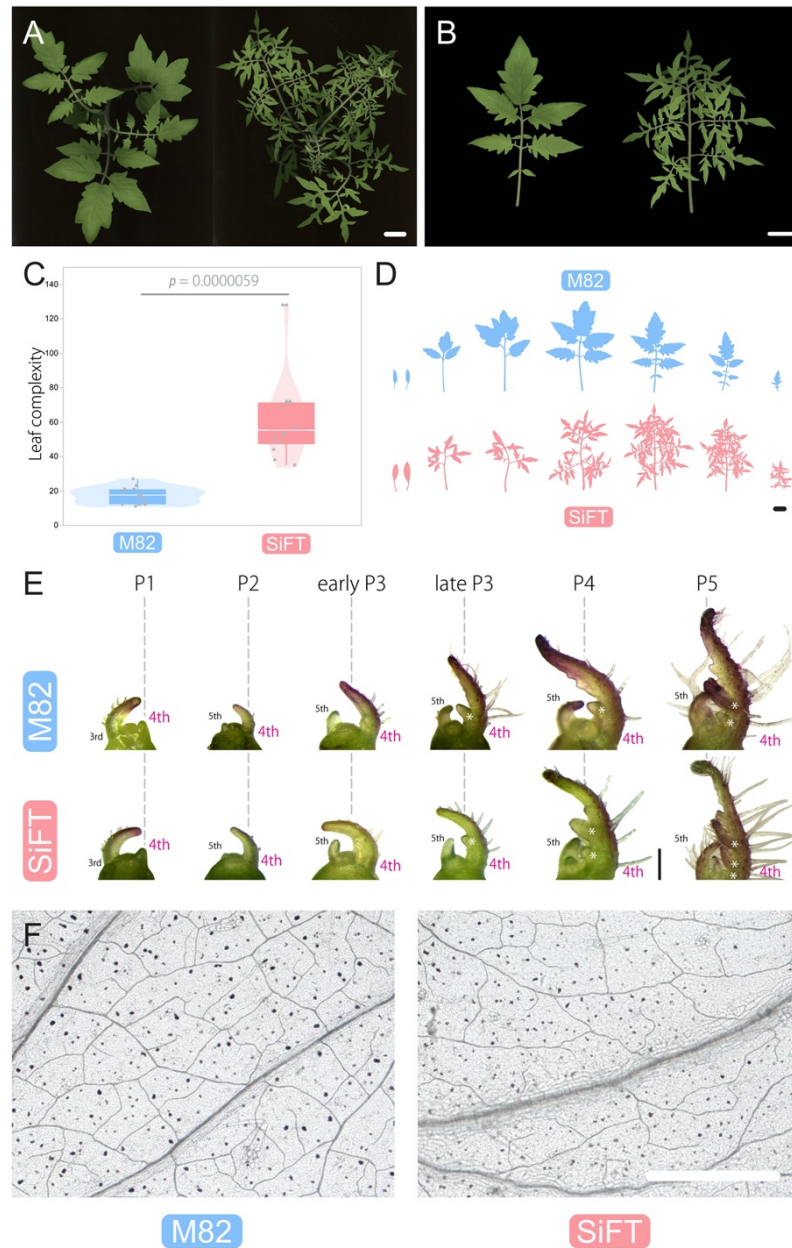

**Figure 1. Gross morphology and development in M82 and SiFT leaves.**

Top view of shoots (A), and mature leaf morphology (B). The 4th leaves were used for (B). Left: M82; right: SiFT. (C) Comparison of leaf complexity ( $N = 14$ ).  $p = 0.0000059$  (Welch's t-test). (D) Comparison of leaf morphology of M82 (upper) and SiFT (lower). All silhouettes are based on photographic images. The youngest leaf is at the right and the oldest (cotyledons) is at the left. (E) Developmental trajectory of M82 and SiFT leaf primordia. The 4th and 5th leaves were represented. (F) Cleared terminal leaflet images of M82 and SiFT. Bars = 2 cm in (A), (B) and (D), 100  $\mu\text{m}$  in (E), and 1 mm in (F).

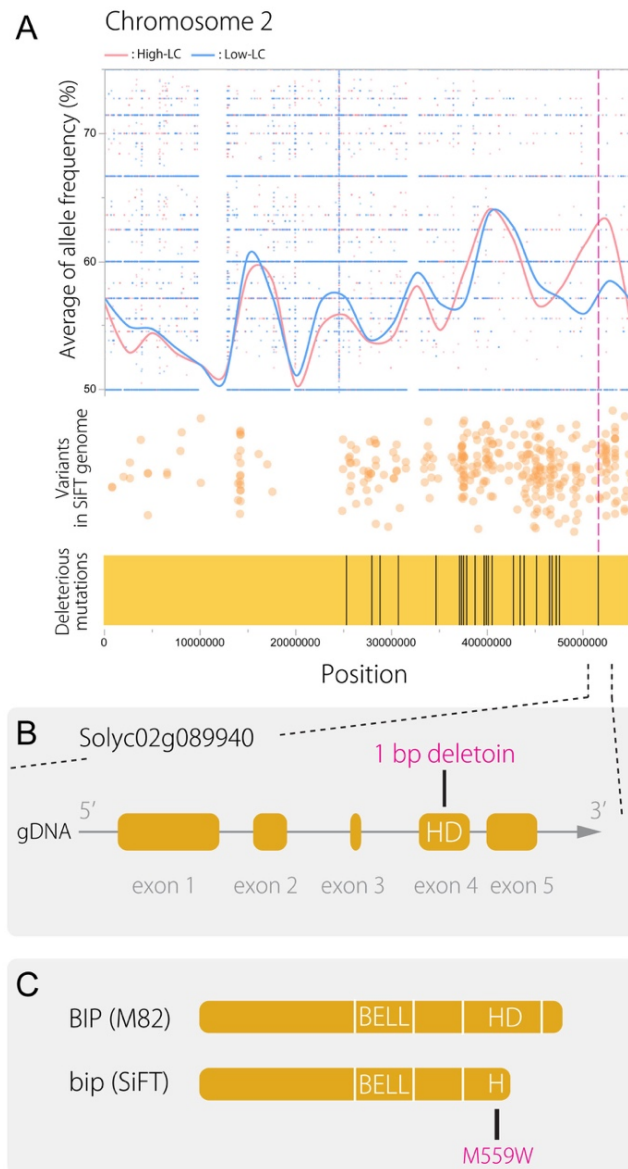

**Figure 2. Identification of the causative mutation for the *BIPINNATA* gene.**

(A) Top: allele frequency between different pools of segregating populations (red: high complexity pool; blue: low complexity pool) is shown for chromosome 2 (Chr 2). Middle: variants (SNPs and indels) in SiFT from whole genome sequencing data. Each dot indicates variant position on Chr 2. Bottom: deleterious mutations in SiFT indicated from PROVEAN. Each vertical line indicates deleterious mutation on Chr 2. All panels (top, middle, and bottom) show the same scale on Chr 2. (B) Exon and intron structure of *BIPINNATA* (*BIP*). *BIP* gene contains five exons. SiFT contains an 1 bp deletion, which leads truncated protein and an amino acid change in the highly conserved amino acid of homeodomain (C).

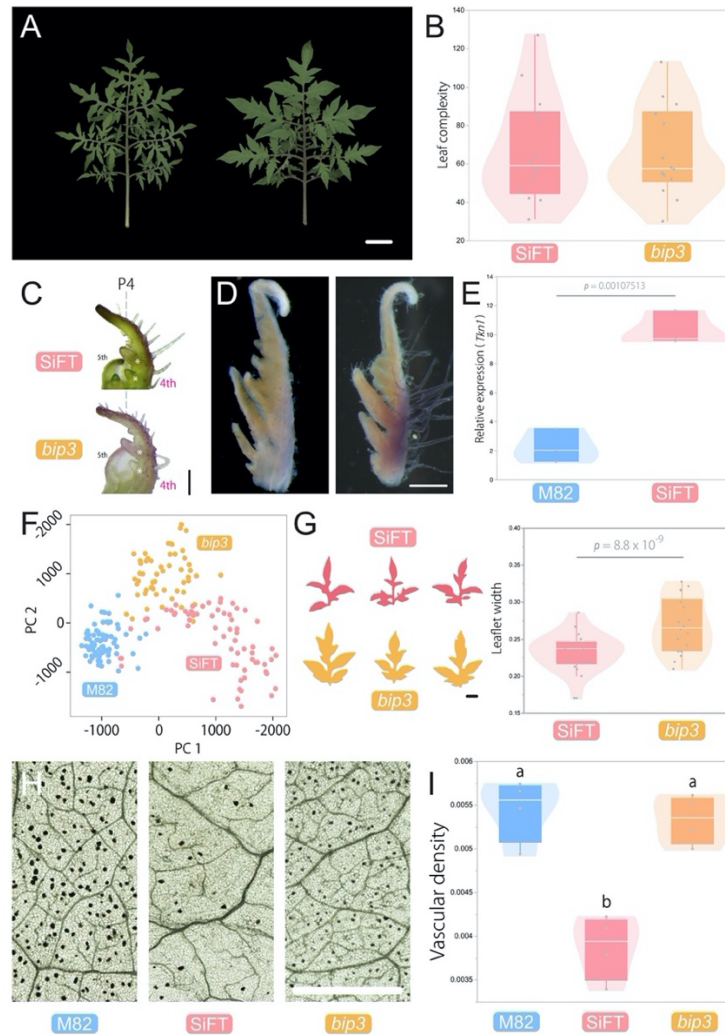

**Figure 3. *bipinnata* leaf phenotypes.**

(A) Mature leaf morphology. The 4th leaves were used. Left: SiFT; right: *bip3*. (B) Comparison of leaf complexity ( $N = 14$ ). (C) Leaf development of *bip3* at P4 stage. (D) Whole mount *in situ* localization of *BIP* transcripts in M82. Left: sense probe; Right: antisense probe. (E) Expression level of *Tkn1* in leaf primordia ( $N = 3$ ).  $p = 0.00107513$  (Welch's *t*-test). (F) Deep learning-based nonlinear PCA with leaflet shapes ( $N < 55$ ). Blue: M82, pink: SiFT, and orange: *bip3*. (G) Comparison of terminal leaflet morphology. Left; leaflet morphology used for leaf shape analysis. All silhouettes are based on scanned images. Right; results of leaf width measurement with terminal leaflets.  $p = 8.8 \times 10^{-8}$  (Welch's *t*-test). (H) Cleared terminal leaflet images of M82, SiFT and *bip3*. (I) Vascular density per unit area. The data was assessed using pair-wise comparisons with Tukey-Kramer HSD test. Bars = 2 cm in (A), 100  $\mu\text{m}$  in (C), 500  $\mu\text{m}$  in (D), 1 cm in (G), and 1 mm in (H).



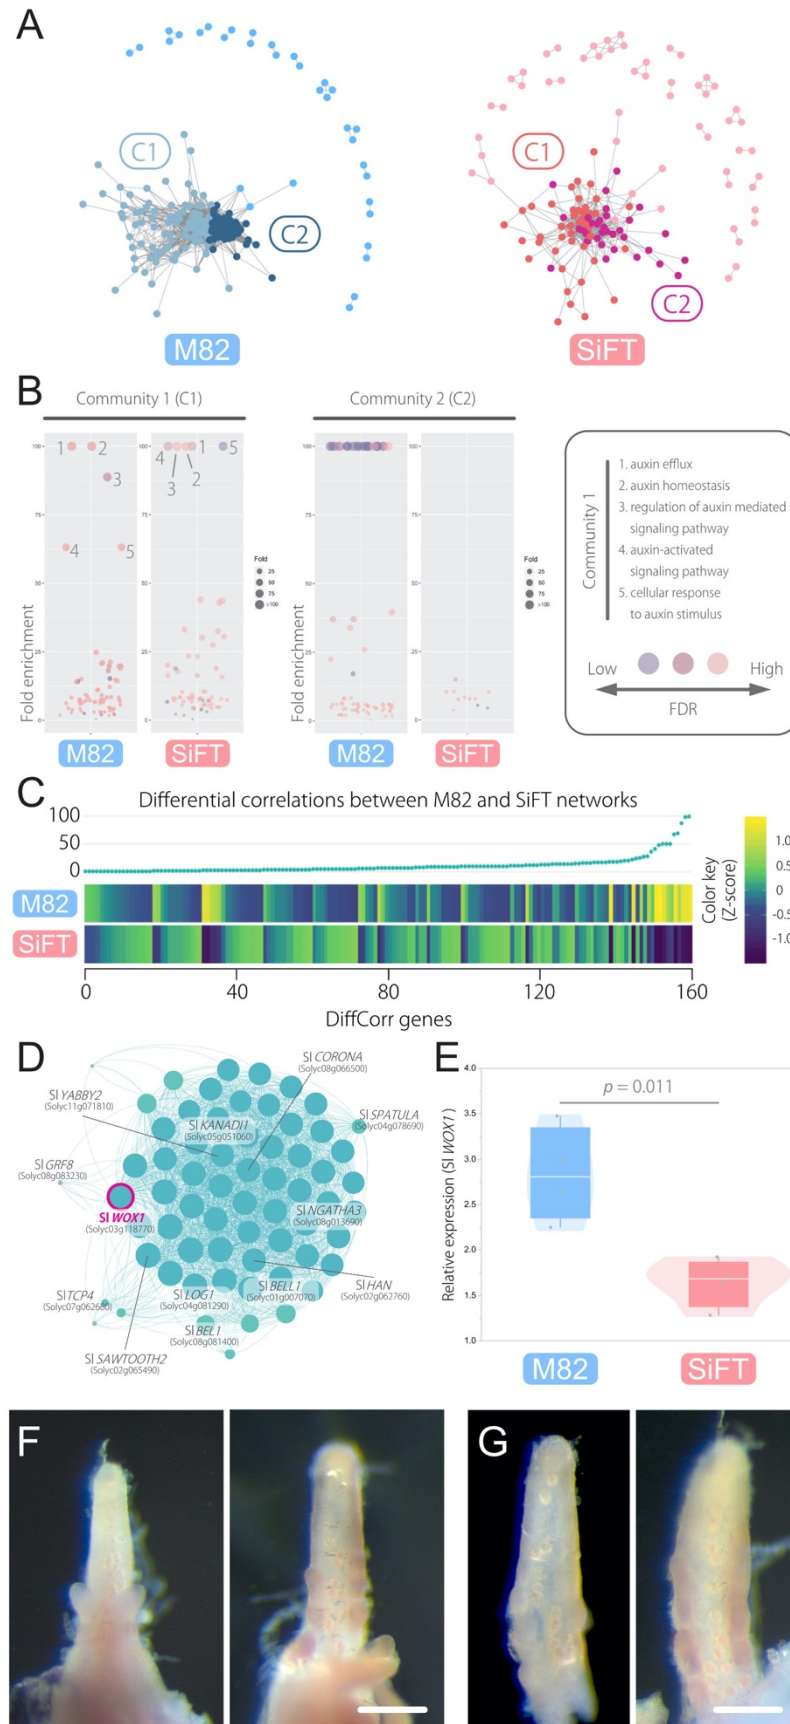

**Figure 4. Gene co-expression network analysis with M82 and SiFT RNA-seq data.**

(A) Gene co-expression networks for genes involved in leaf development. Each node represents genes. Only nodes with at least one edge are represented. Left: M82; right: SiFT. (B) An overview of the enriched GO terms visualized by bubble plot. The analysis was performed by the community in each network (C1 and C2). Each bubble represents a GO term and only GO terms with higher Fold enrichment ( $>50$ ) are represented. For full result of the GO enrichment analysis, please see Supplementary Table 3. (C) A profile of 160 DiffCorr genes. The plot on the top: the number of differential correlations of each DiffCorr gene. A higher number means more difference between M82 and SiFT networks. The heat map on the bottom: a comparison of expression level of each DiffCorr gene between M82 and SiFT. Each expression level is shown as a blue-to-yellow-colored scale. The 160 DiffCorr genes were sorted by the number of differential correlations (Left: low; right: high). The position of each gene is the same between the top and bottom panels. (D) The Sl *WOX1* gene network from M82 shown in (A). This network is consisted of genes only showing a direct connection to the Sl *WOX1*. (E) Expression level of Sl *WOX1* in leaf primordia ( $N = 4$ ).  $p = 0.011$  (Welch's  $t$ -test). (F and G) Whole mount *in situ* localization of Sl *WOX1* transcripts in M82. (F) Leaf primordia. (G) Leaflet primordia. Left: sense probe; right: antisense probe in each panel. Bars = 100  $\mu\text{m}$  in (F) and (G).

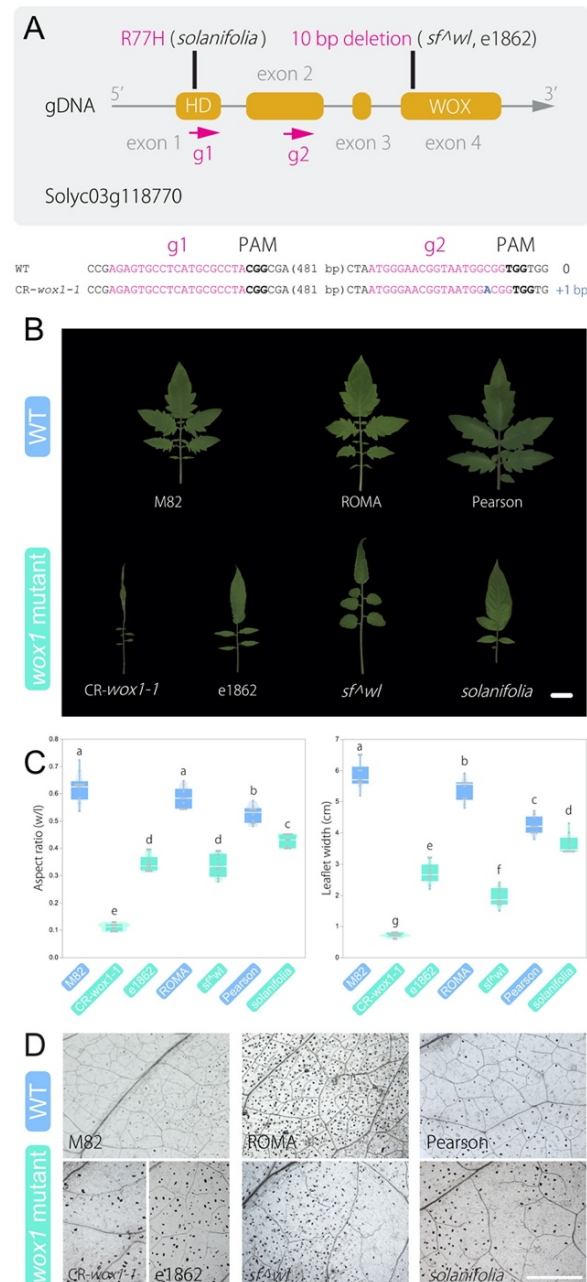

(A) Exon and intron structure of *SF/SlWOX1*. The tomato *SF/SlWOX1* gene contains four exons. (B) Mature leaf morphology of *sf/slwox1* mutants. The 4th leaves were used. (C) Comparison of aspect ratio (width/length) and width of terminal leaflet ( $N = 10$ ). Letters indicate significance groups; samples with the same letters are not significantly different. All data were assessed using pair-wise comparisons with Tukey-Kramer HSD test. (D) Comparison of vascular density. Cleared terminal leaflet images. Bars = 2 cm in (B) and 1 mm in (D).

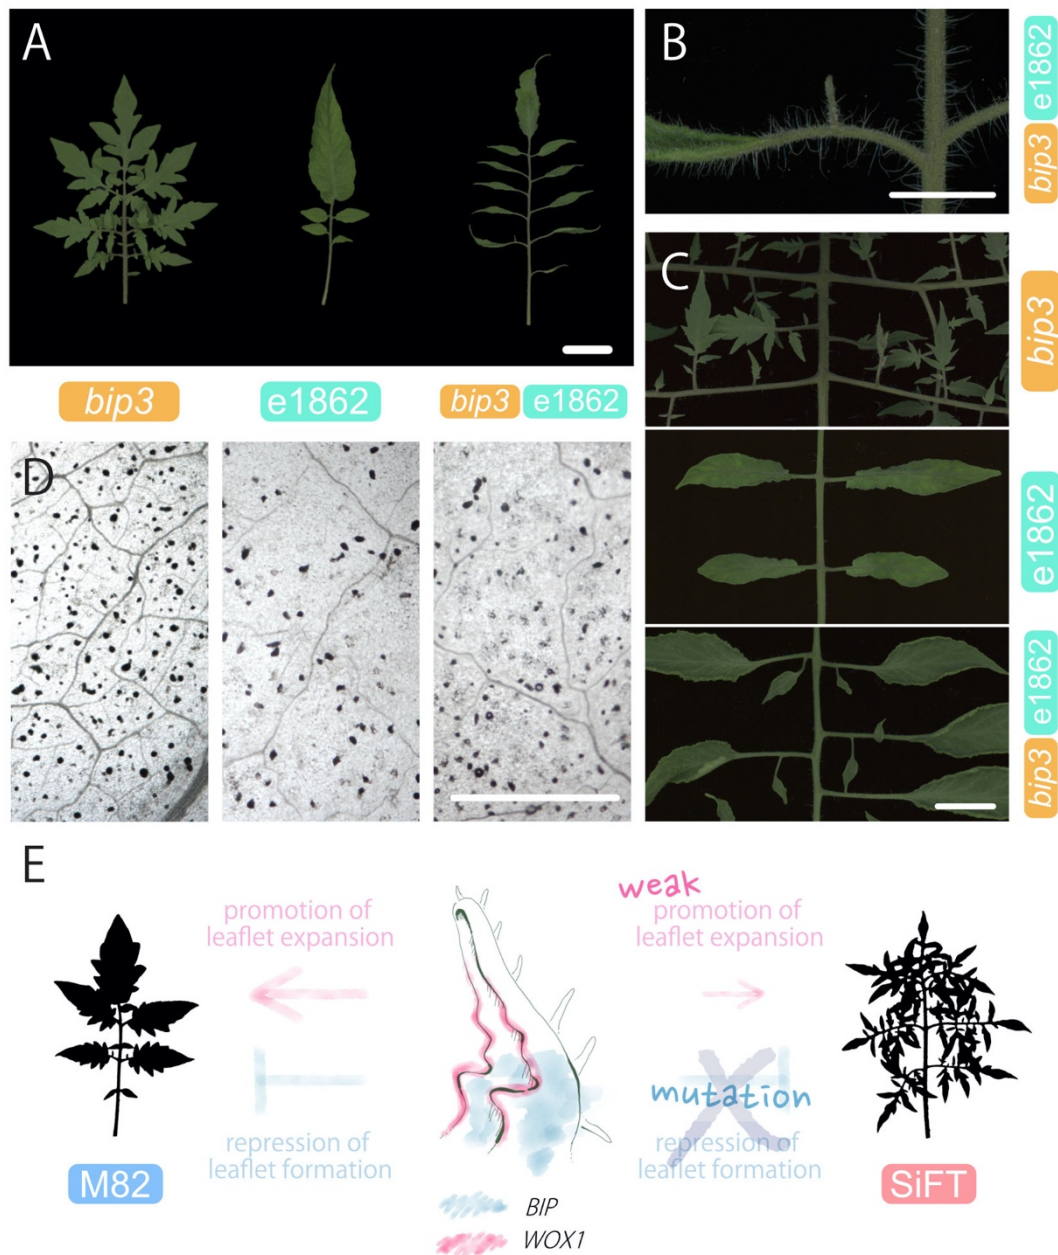

**Figure 6. *bip sf* double mutant leaf phenotypes.**

(A) Mature leaf morphology of *bip3 e1862* double mutant. From left to right: *bip3*, *e1862*, and *bip3 e1862* double mutant. The 4th leaves were used. (B) Close-up view of a secondary leaflet on a 4th leaf in the double mutant shown in (A). (C) Comparison of secondary leaflets on a 6th leaf from 60 days old seedlings. (D) Cleared terminal leaflet images of *bip3*, *e1862*, and *bip3 e1862* double mutant. (E) A schematic model for leaf development in SiFT. Bars = 2 cm in (A) and (C), 1 cm in (B), and 1mm = in (D).

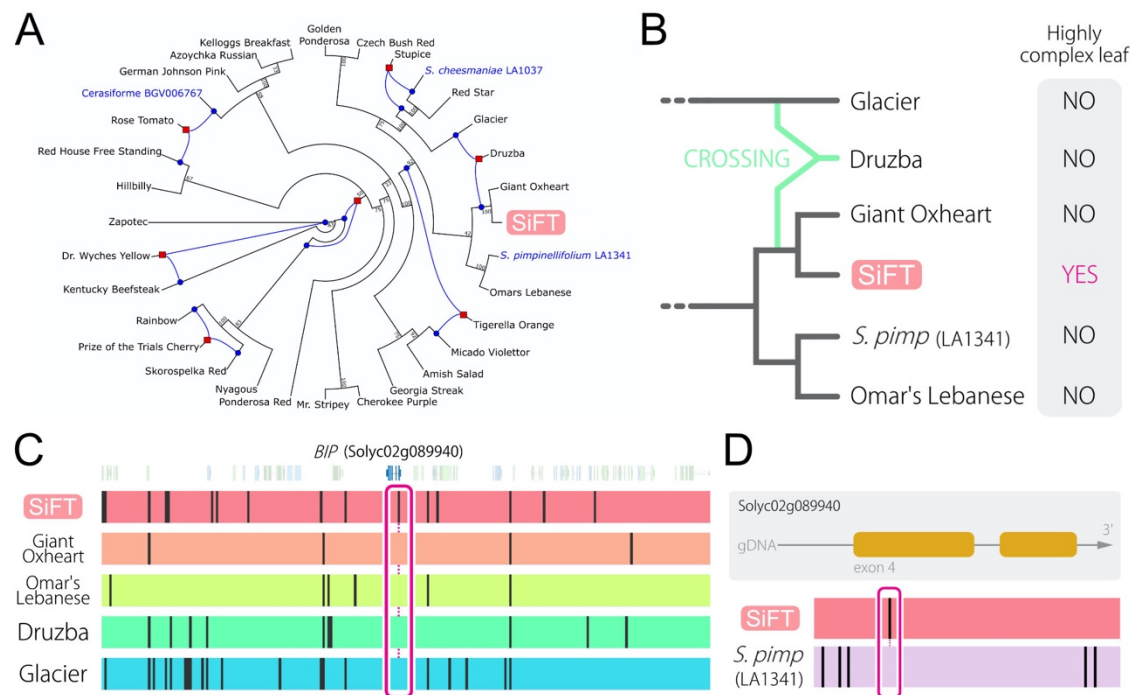

**Figure 7. Reconstruction of breeding history and comparison of SNPs data.**

(A) PhyloNetwork with sequences around the *BIP* locus on chromosome 2. The network describes various biological processes such as hybridization or introgression (Blue lines). The bootstrap values are indicated on branches (only those more than 50% are indicated on the tree). (B) Magnified view of the network shown in (A) focusing on SiFT. Comparison of SNPs data around *BIP* locus (Solyc02g089940) with heirloom tomatoes (C) and a wild species (D). Each vertical black line indicates a SNP.

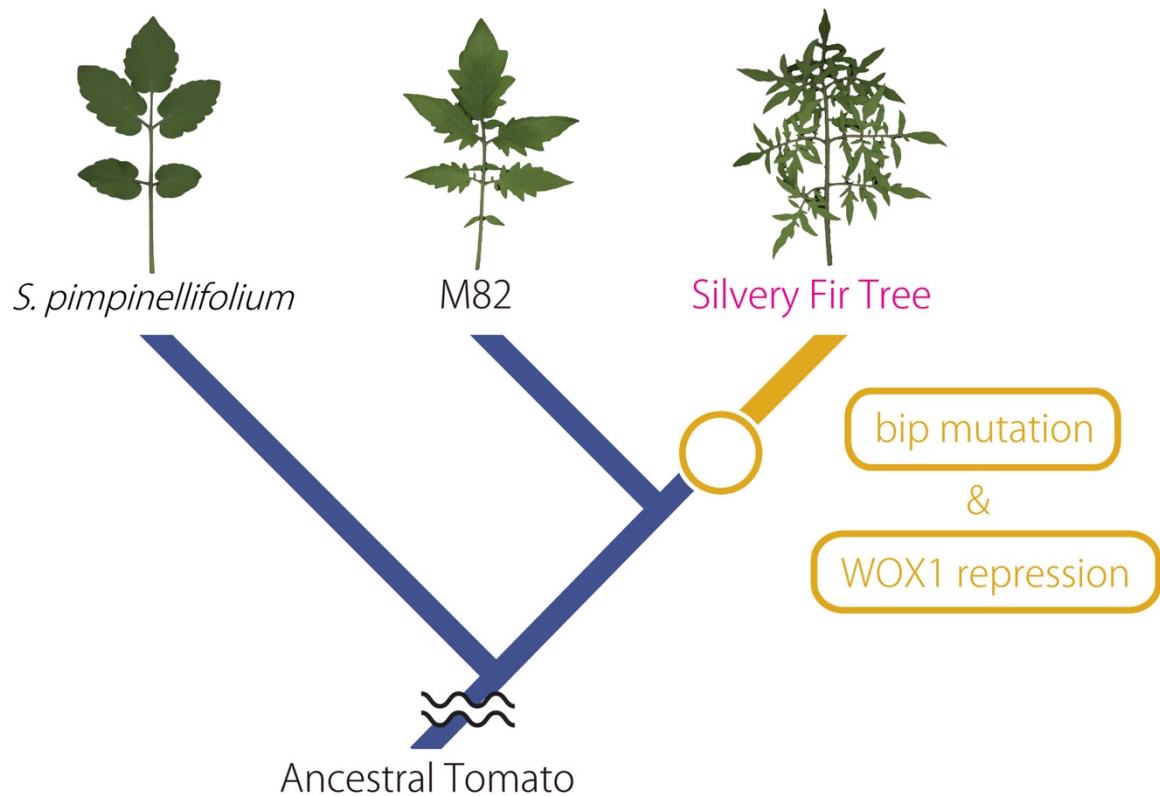

**Figure 8. Breeding history and diversification of leaf shape in cultivated Tomato.** Simplified phylogeny presented in Fig. 7 with leaf morphologies. Boxes indicate presumed key events during evolution. See text for details.
